# Supplementary material for: New STLV-3 strains and a divergent SIVmus strain identified in non-human primate bushmeat in Gabon
Source: PubMed Central journal article supplement (PMC3413610; doi:10.1186/1742-4690-9-28), 2012-03-30
Supplement: 1742-4690-9-28-S1.pdf [file 1742-4690-9-28-S1.pdf]

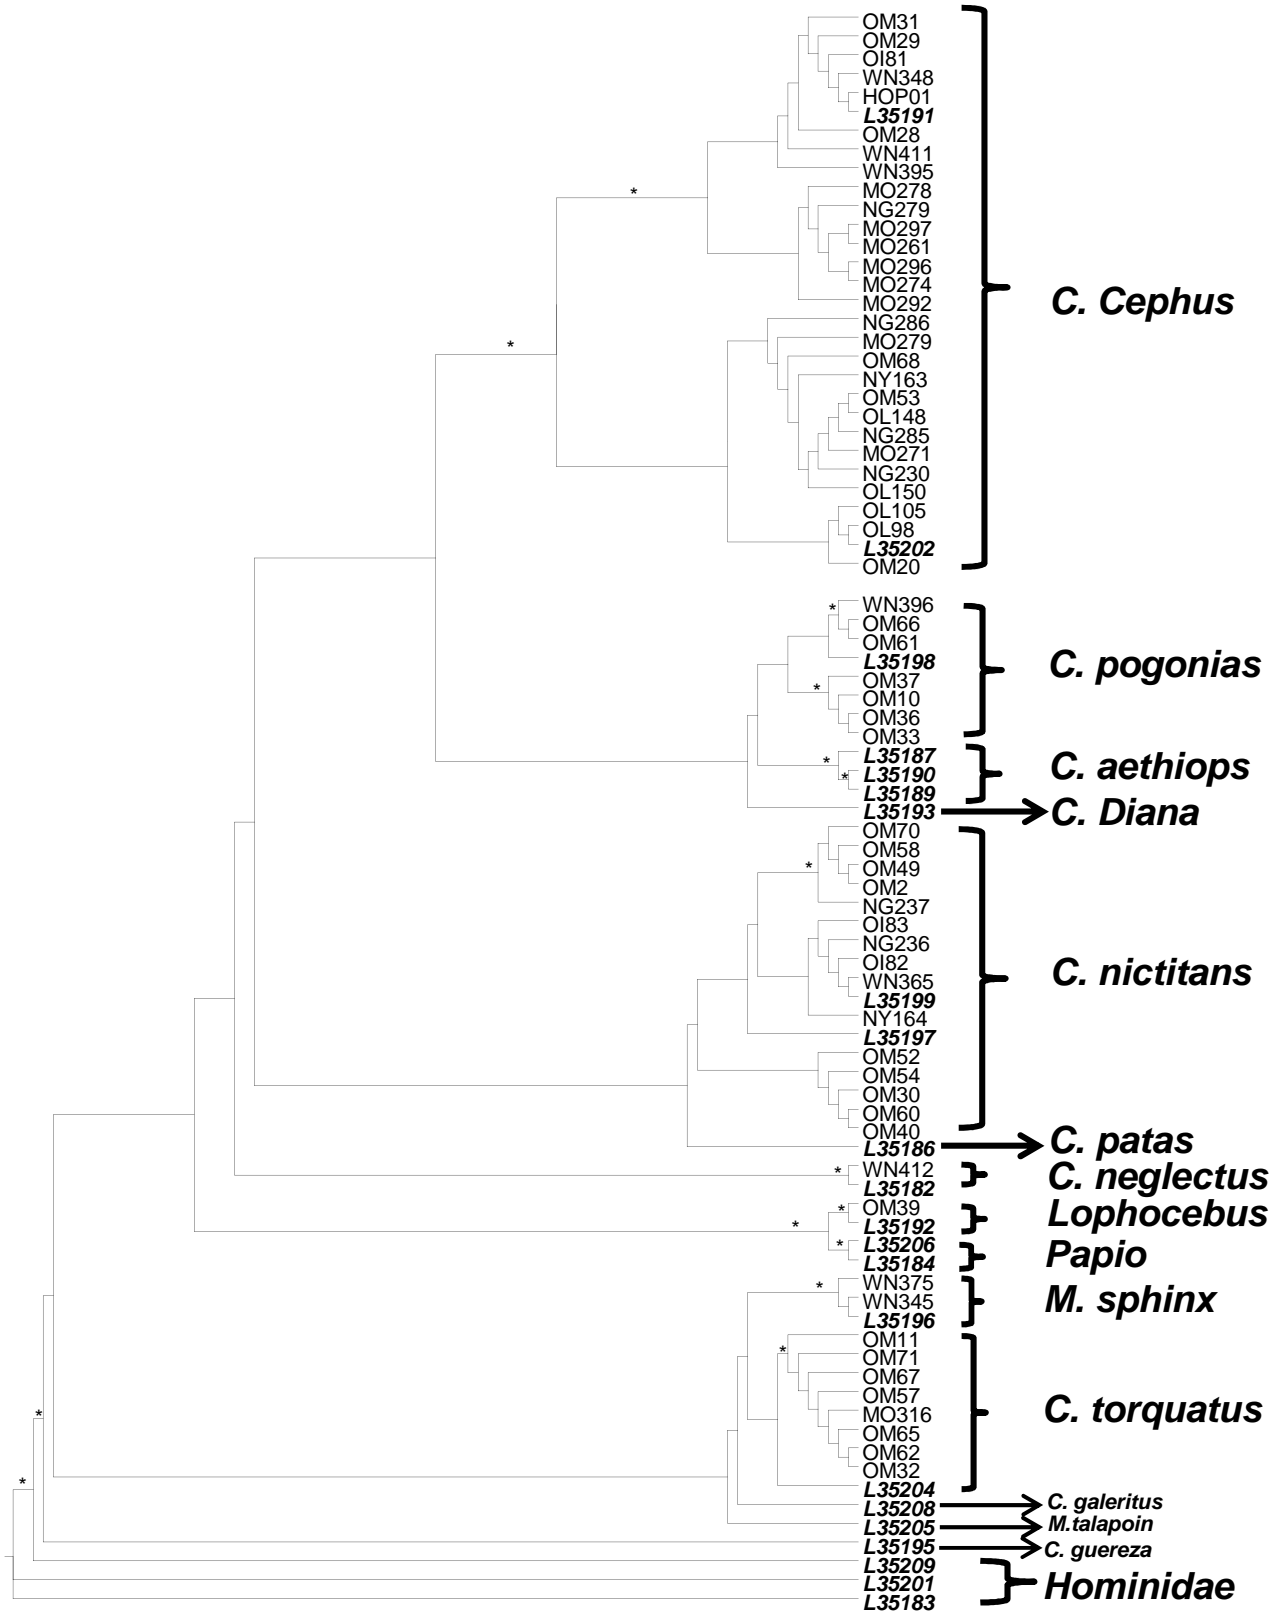

0.05
